# Supplementary material
Source: PubMed Central journal article supplement (PMC10629462)
Supplement: NIHMS1935063-supplement-1.pdf [file NIHMS1935063-supplement-1.pdf]

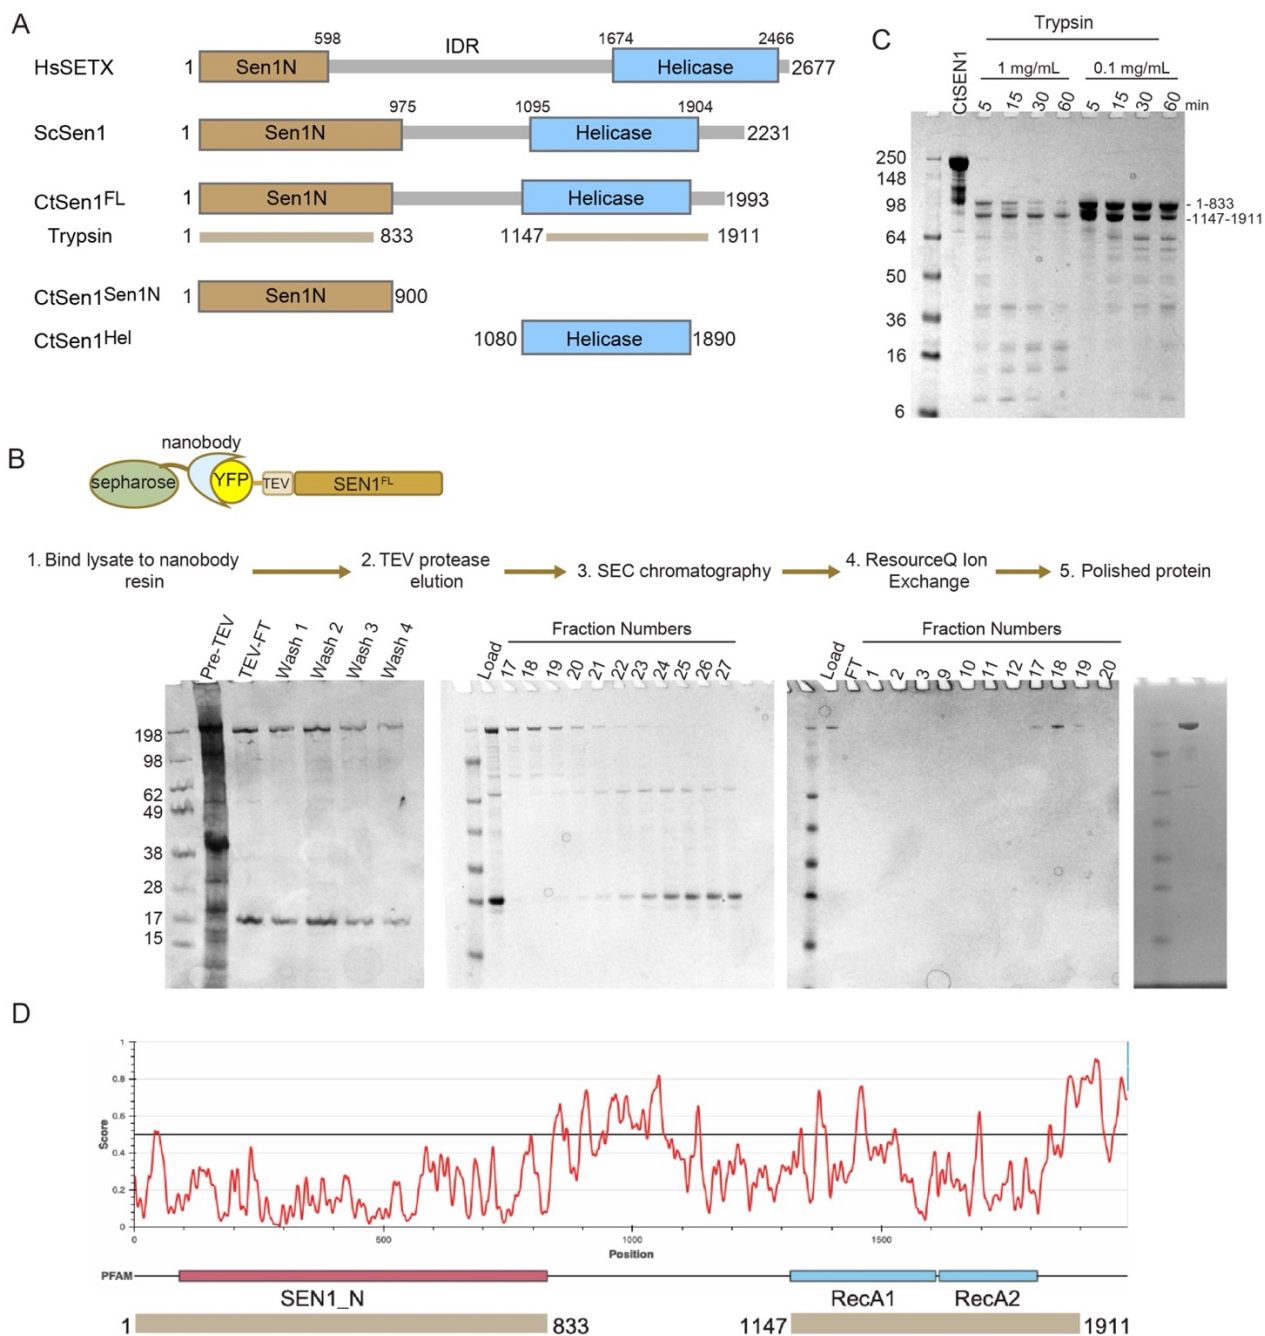

**Supplementary Figure 1. Purification and characterization of *Chaetomium thermophilum* Sen1, Related to STAR methods**

(A) Domain architecture of CtSen1. Brown lines mark boundaries of trypsin stable domains.

(B) Purification scheme for YFP-CtSen1. Anti-GFP nanobody conjugated sepharose resin binds tightly to YFP-CtSen1. The purified protein is released from the column by overnight cleavage with TEV-protease, and subsequently purified by size-exclusion and ion exchange chromatography. Representative gels of the TEV elution, ion exchange and SEC, and purified protein are shown.

(C) Limited trypsin proteolysis of CtSen1<sup>FL</sup> yields two stable Sen1 domains.

(D) IUPred (Dosztanyi et al., 2005) disorder plot of CtSen1 shows two structured regions of the protein map to the N- and C-terminal domains defined by tryptic proteolysis.

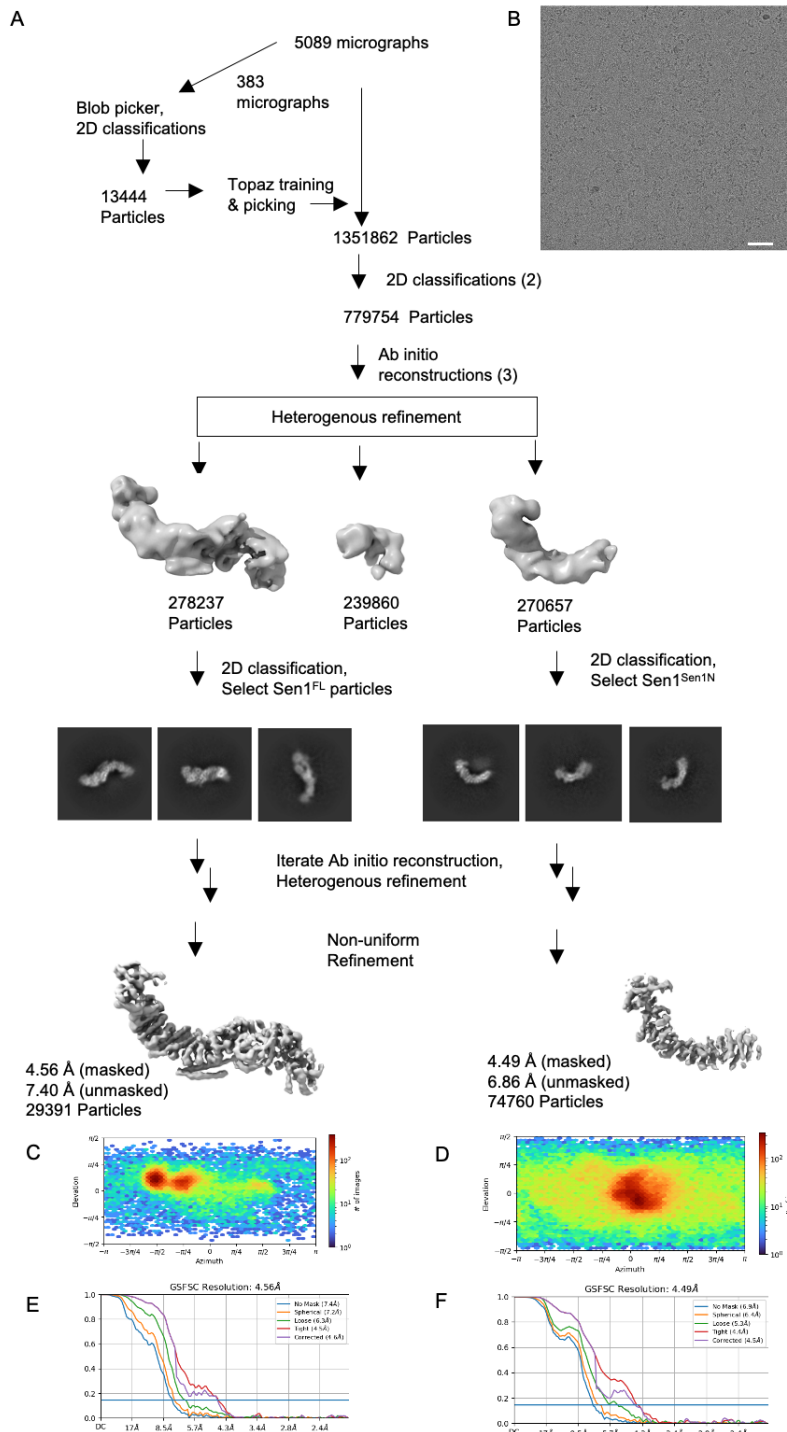

**Supplementary Figure 2. Cryo-EM data collection and processing for Sen1<sup>FL</sup> and Sen1<sup>Sen1N</sup>, Related to Figure 1 and STAR methods**

- (A) Flowchart of CryoSPARC image processing for Sen1<sup>FL</sup>
- (B) Example micrograph of Sen1<sup>N-PP-C</sup>. Scale bar 20 nm.
- (C) Angular distribution plot of particles used in the Sen1<sup>FL</sup> reconstruction.
- (D) Angular distribution plot of particles used in the Sen1<sup>Sen1N</sup> reconstruction.
- (E) Fourier Shell correlation for the Sen1<sup>FL</sup> reconstruction.
- (F) Fourier Shell correlation for the Sen1<sup>Sen1N</sup> reconstruction.

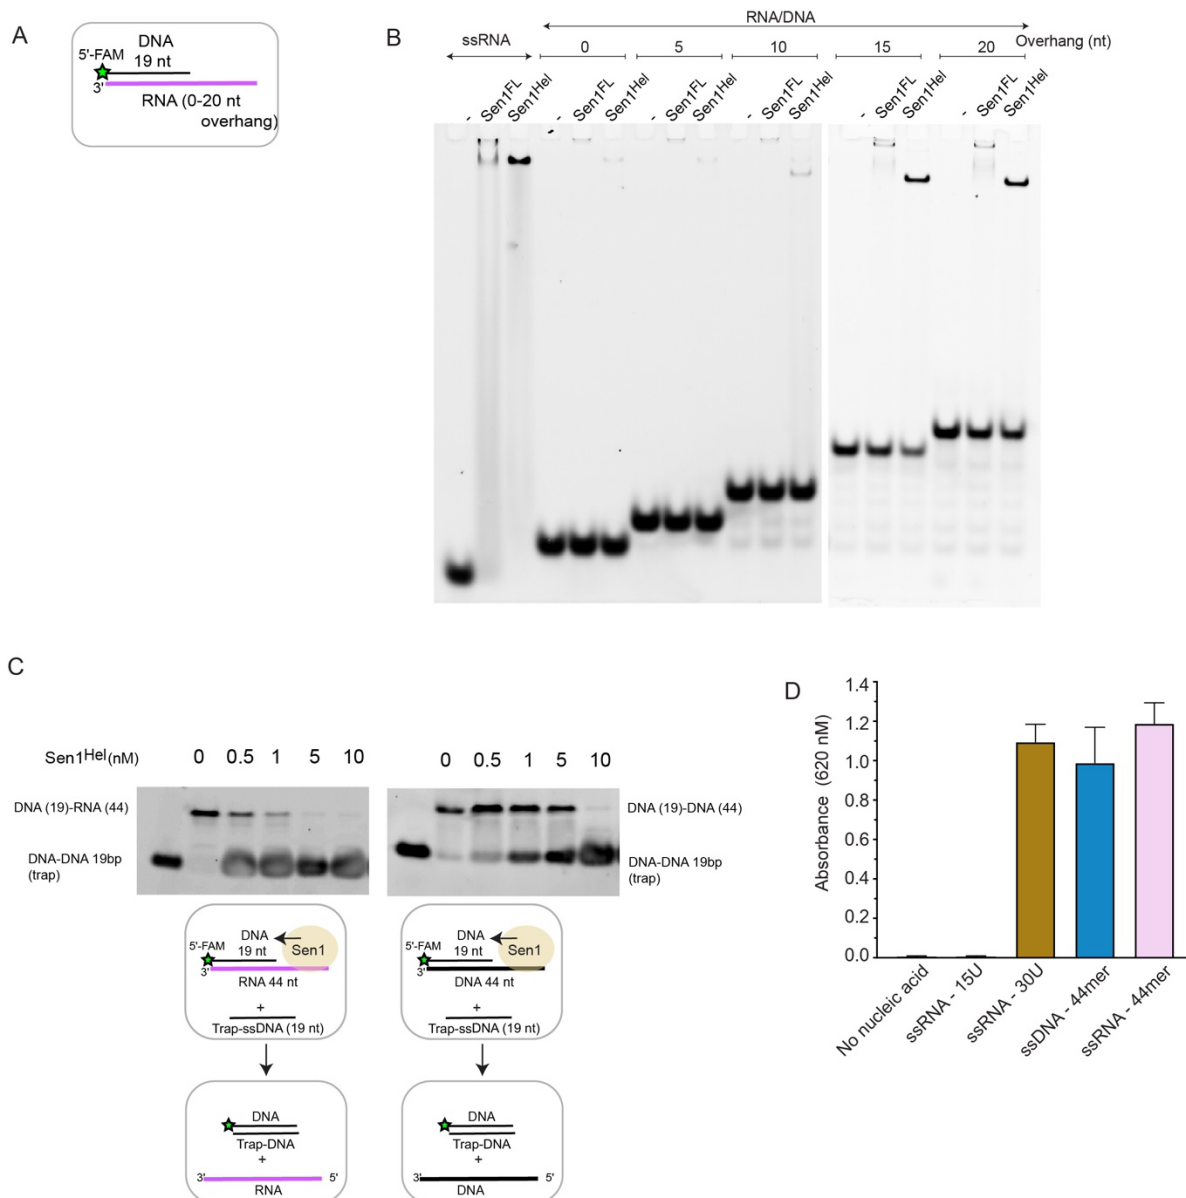

**Supplementary Figure 3. RNA-DNA binding and helicase activity of Sen1<sup>FL</sup> and Sen1<sup>Hel</sup>, Related to Figure 2 and STAR Methods**

- (A) EMSA substrates for assays shown in panel “b” vary the length of RNA overhang.  
 (B) EMSA analysis of Sen1<sup>FL</sup> and Sen1<sup>Hel</sup>. RNA-DNA substrates (10 nM, Sub1-Sub4) were incubated with Sen1<sup>FL</sup> (50 nM) or Sen1<sup>Hel</sup> (50 nM) on ice for 15 min. Samples were resolved on 6% TBE gels and FAM-labeled reaction products were visualized on a Typhoon FLA 9000 scanner (GE Healthcare).  
 (C) Sen1<sup>Hel</sup> activity on RNA-DNA hybrid (left) versus and equivalent DNA-DNA duplex (right).  
 (D) Sen1<sup>Hel</sup> (5 nM) was incubated with 15U-RNA, 30U-RNA, 44-DNA and 44-RNA (Supplementary Table 4) at 5  $\mu$ M and ATP (1 mM) for 15 min at 37°C. The hydrolysis products were detected using colorimetric Malachite Green Phosphate Assay Kit. Absorbance was measured at 620 nm.

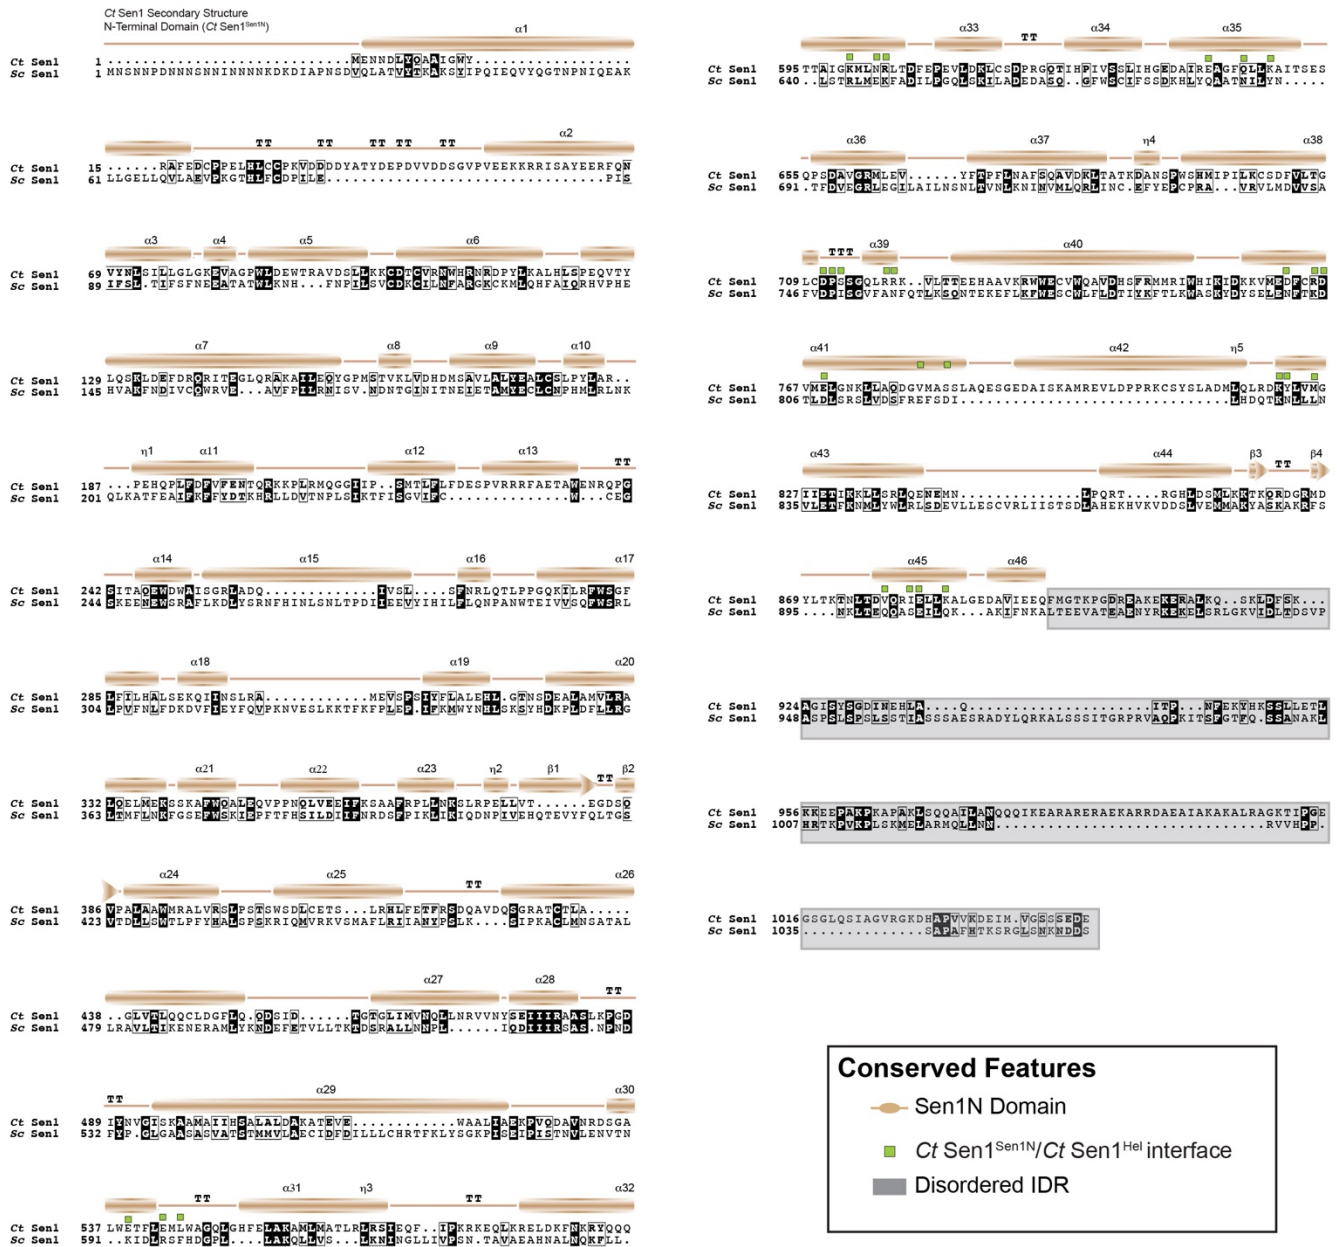

### Supplementary Figure 4. CtSen1 sequence alignments, Related to Figure 2

Sequence alignment of the Sen1 amino terminal Sen1N region. Alignments were generated in ClustalW, rendered within Esript, and annotated in Adobe Illustrator. Secondary structure from Esript is noted, TT= tight turn.

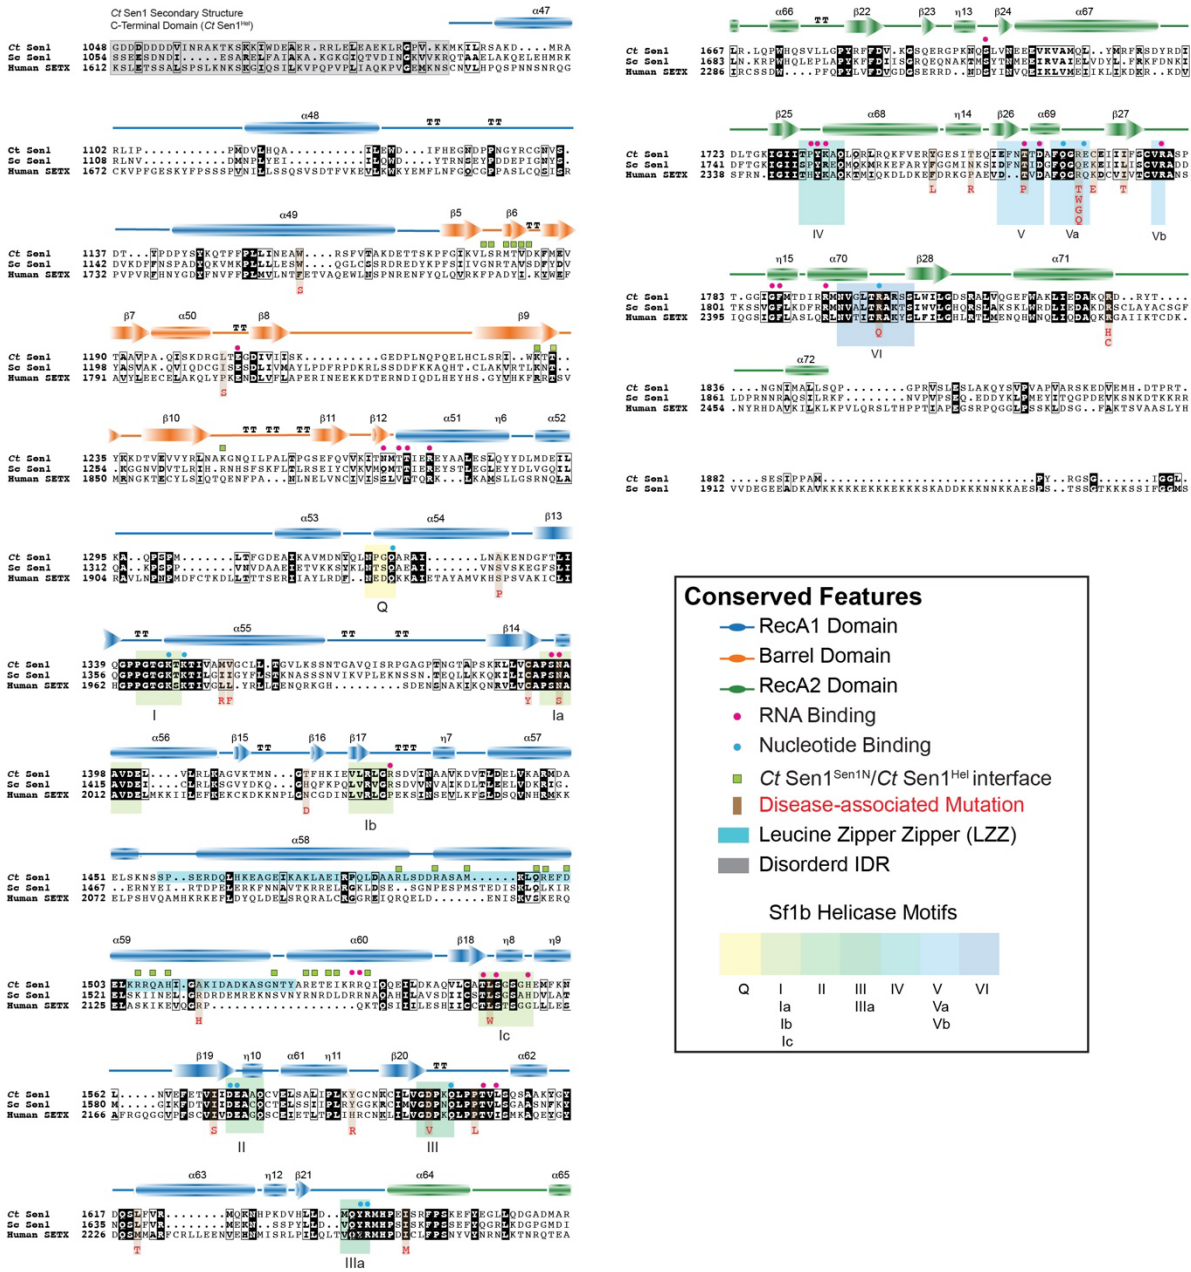

### Supplementary Figure 5. CtSen1 sequence alignments, Related to Figure 2

Sequence alignment of the Sen1 helicase domain. Alignments were generated in ClustalW, rendered within Espritt, and annotated in Adobe Illustrator. Secondary structure from Espritt is noted, TT= tight turn.

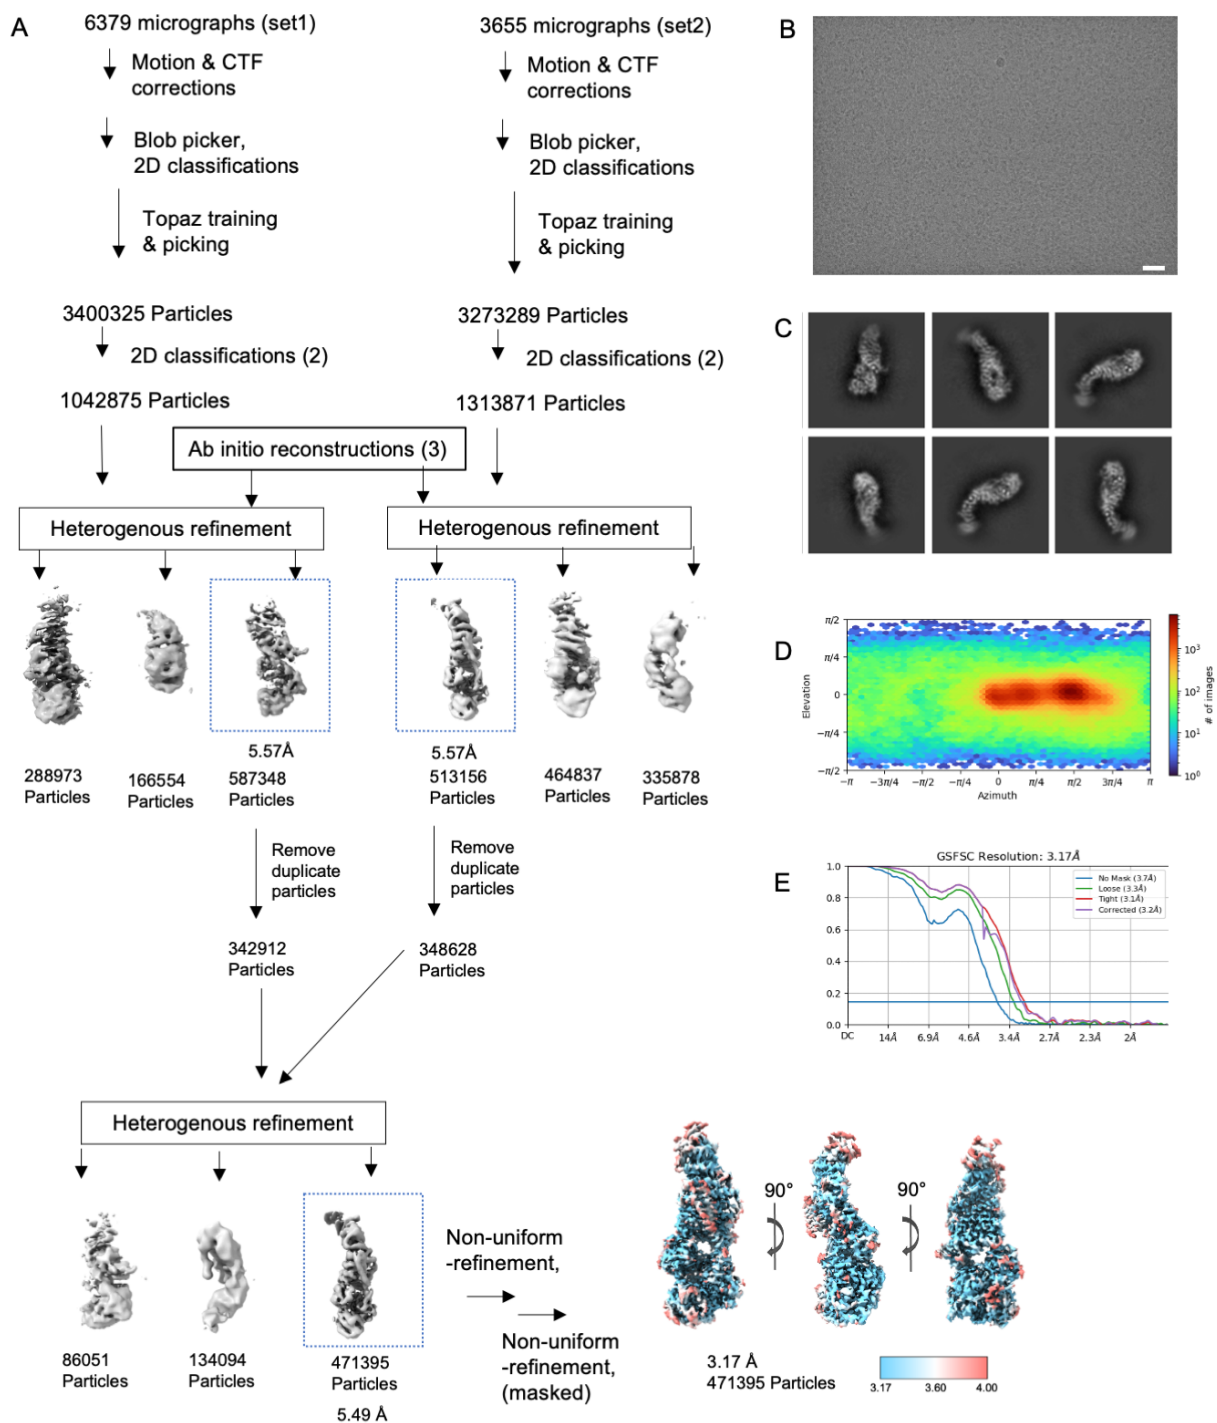

**Supplementary Figure 6. Cryo-EM data collection and processing for Sen1<sup>N-PP-C</sup>, Related to Figure 5**

- (A) Flowchart of CryoSparrc image processing for Sen1<sup>N-PP-C</sup>.
- (B) Example micrograph of Sen1<sup>N-PP-C</sup>. Scale bar 20 nm.
- (C) Representative 2D class averages of Sen1<sup>N-PP-C</sup>.
- (D) Angular distribution plot of particles used in the Sen1<sup>N-PP-C</sup> reconstruction.
- (E) Fourier Shell correlation for Sen1<sup>N-PP-C</sup>.

**Supplementary Table 1.** AOA2 and ALS4 mutations in Sen1 helicase domain, Related to Figure 7

| <b>Domain</b> | <b>Human SETX*</b>                           | <b>ScSen1</b>                           | <b>CtSen1</b>                                | <b>Disease</b>               | <b>Possible Structural Impacts</b>     |
|---------------|----------------------------------------------|-----------------------------------------|----------------------------------------------|------------------------------|----------------------------------------|
| Helicase      | F 1756 S                                     | W 1166 S                                | W 1158 S                                     | AOA2                         | Folding                                |
| Helicase      | P 1805 S                                     | V 1205 S                                | L 1203 S                                     | AOA2                         | RNA binding, Folding                   |
| Helicase      | A 1945 P                                     | S 1346 P                                | L 1329 P                                     | AOA2                         | Folding                                |
| Helicase      | L 1976 R                                     | I 1370 R                                | M 1353 R                                     | AOA2                         | Folding                                |
| Helicase      | L 1977 F                                     | I 1371 F                                | V 1354 F                                     | AOA2                         | Folding                                |
| Helicase      | C 2006 Y                                     | C 1409 Y                                | C 1392 Y                                     | AOA2                         | RNA Binding, Folding                   |
| Helicase      | N 2010 S                                     | N 1413 S                                | N 1396 S                                     | AOA2                         | RNA binding                            |
| Helicase      | N 2037 D                                     | H 1433 D                                | T 1406 D                                     | AOA2                         | Folding                                |
| Helicase      | R 2136 H<br>R 2136 C                         | D 1550 H<br>D 1550 C                    | K 1532 H<br>K 1532 C                         | ALS4<br>ALS4                 | RNA/DNA hybrid binding                 |
| Helicase      | L 2155 W                                     | L 1569 W                                | L 1551 W                                     | AOA2                         | RNA binding/Folding                    |
| Helicase      | I 2179 S                                     | I 1588 S                                | I 1570 S                                     | AOA2                         | Folding                                |
| Helicase      | H 2197 R                                     | Y 1606 R                                | Y 1588 R                                     | AOA2                         | Folding                                |
| Helicase      | D 2207 V                                     | D 1616 V                                | D 1598 V                                     | AOA2                         | ATP binding/hydrolysis                 |
| Helicase      | P 2213 L                                     | P 1622 L                                | P 1604 L                                     | AOA2                         | RNA binding                            |
| Helicase      | M 2229 T                                     | L 1638 T                                | L 1620 T                                     | AOA2                         | Folding                                |
| Helicase      | I 2264 M                                     | I 1661 M                                | I 1645 M                                     | AOA2                         | Folding                                |
| Helicase      | F 2363 L                                     | F 1767 L                                | Y 1749 L                                     | AOA2                         | Folding, Surface binding site          |
| Helicase      | P 2368 R                                     | N 1772 R                                | T 1754 R                                     | AOA2<br>AOA2                 | Folding, Surface binding site          |
| Helicase      | T 2373 P                                     | T 1779 P                                | T 1761 P                                     | AOA2                         | RNA binding                            |
| Helicase      | R 2380 T<br>R 2380 W<br>R 2380 G<br>R 2380 Q | Q 1786 T<br>Q 1786 W<br>Q 1786 G<br>N/A | R 1768 T<br>R 1768 W<br>R 1768 G<br>R 1768 Q | AOA2<br>AOA2<br>AOA2<br>AOA2 | Protein folding, conformational change |
| Helicase      | K 2382 E                                     | K 1788 E                                | C 1770 E                                     | AOA2                         | Protein folding, conformational change |
| Helicase      | I 2386 T                                     | L 1792 T                                | I 1774 T                                     | AOA2                         | Folding                                |
| Helicase      | R 2414 Q                                     | R 1820 Q                                | R 1801 Q                                     | AOA2                         | ATP binding/hydrolysis                 |
| Helicase      | R 2444 H<br>R 2444 C                         | R 1850 H<br>R 1850 C                    | R 1831 H<br>R 1831 C                         | AOA2<br>AOA2                 | Folding                                |

[S1],[S2]





- S1. Chen Y. Z., Bennett C. L., Huynh H. M., Blair I. P., Puls I., et al., (2004). DNA/RNA helicase gene mutations in a form of juvenile amyotrophic lateral sclerosis (ALS4). *Am. J. Hum. Genet.* 74, 1128–1135.
- S2. Chen, X., Muller, U., Sundling, K.E., and Brow, D.A. (2014). *Saccharomyces cerevisiae* Sen1 as a model for the study of mutations in human Senataxin that elicit cerebellar ataxia. *Genetics* 198, 577-590. 10.1534/genetics.114.167585.
